# Supplementary material
Source: HighWire-hosted journal article supplement (https://www.cmaj.ca/highwire/filestream/58328/field_highwire_adjunct_files/0/five-opioids-appendix_1.pdf)
Supplement: five-opioids-appendix_1.pdf [file five-opioids-appendix_1.pdf]

## **Appendix 1: Resources for opioid prescribing**

Consult your local palliative care team or palliative care provider

### **Palliative opioid prescribing tool**

- Downloadable tool for prescribing opioids in advanced disease, written and reviewed by the Palliative Outreach and Consult Team of the Hospice Palliative Care Program at Providence Health Care in Vancouver, BC (available in Appendix 2, at [www.cmaj.ca/cgi/content/full/cmaj.110024/DC1](http://www.cmaj.ca/cgi/content/full/cmaj.110024/DC1)).

### **Palliative care guidelines and handbook**

- Online prescribing resource based in Wales, UK, but much of the information is universal (<http://book.pallcare.info/>).

### **Fast facts and concepts from EPERC (End of life / Palliative Education Resource Center)**

- Peer-reviewed, one-page outlines of key information on important end-of-life topics for educators and clinicians ([www.eperc.mcw.edu/EPERC/FastFactsIndex](http://www.eperc.mcw.edu/EPERC/FastFactsIndex)).

### **Canadian Virtual Hospice**

- Canadian education and resource site for health care professionals and for patients and families. Users are able to ask questions of palliative care experts and find more-in depth resources ([www.virtualhospice.ca/en\\_US/Main+Site+Navigation/Home.aspx](http://www.virtualhospice.ca/en_US/Main+Site+Navigation/Home.aspx)).

### **Canadian Network of Palliative Care for Children**

- A network of professionals involved in palliative and end-of-life care for children. The website has a wide variety of resources, including clinical resources for pain management in children (<http://cnpcc.ca>).
